# Supplementary material for: Structural insights into the human PA28–20S proteasome enabled by efficient tagging and purification of endogenous proteins
Source: PubMed Central journal article supplement (PMC9388094; doi:10.1073/pnas.2207200119), 2022-07-19
Supplement: pnas.2207200119.sapp.pdf [file pnas.2207200119.sapp.pdf]

## **Structural insights into human PA28-20S proteasome enabled by efficient tagging and purification of endogenous proteins**

Jianhua Zhao<sup>1,#,\*,§</sup>, Suraj Makhija<sup>2,&,\*</sup>, Chenyu Zhou<sup>#</sup>, Hanxiao Zhang<sup>#</sup>, Yongqiang Wang<sup>5</sup>, Monita Muralidharan<sup>6</sup>, Bo Huang<sup>3,4,§</sup>, Yifan Cheng<sup>1,5,§</sup>

<sup>1</sup> Department of Biochemistry and Biophysics, University of California San Francisco. San Francisco, CA 94143, USA

<sup>2</sup> UC Berkeley – UCSF Joint Graduate Program in Bioengineering, University of California, San Francisco, CA 94143, USA

<sup>3</sup> Department of Pharmaceutical Chemistry, University of California San Francisco, San Francisco, CA 94143, USA

<sup>4</sup> Chan Zuckerberg Biohub, San Francisco, CA 94158, USA

<sup>5</sup> Howard Hughes Medical Institute, University of California San Francisco, San Francisco, CA, 94143, USA

<sup>6</sup> Department of Cellular Molecular Pharmacology, University of California San Francisco, San Francisco, CA 94143, USA

\* These authors contributed equally

§ Correspondence: [jzhao@sbpdiscovery.org](mailto:jzhao@sbpdiscovery.org), [Bo.Huang@ucsf.edu](mailto:Bo.Huang@ucsf.edu) and

[Yifan.Cheng@ucsf.edu](mailto:Yifan.Cheng@ucsf.edu)

### **Supplementary Figures**



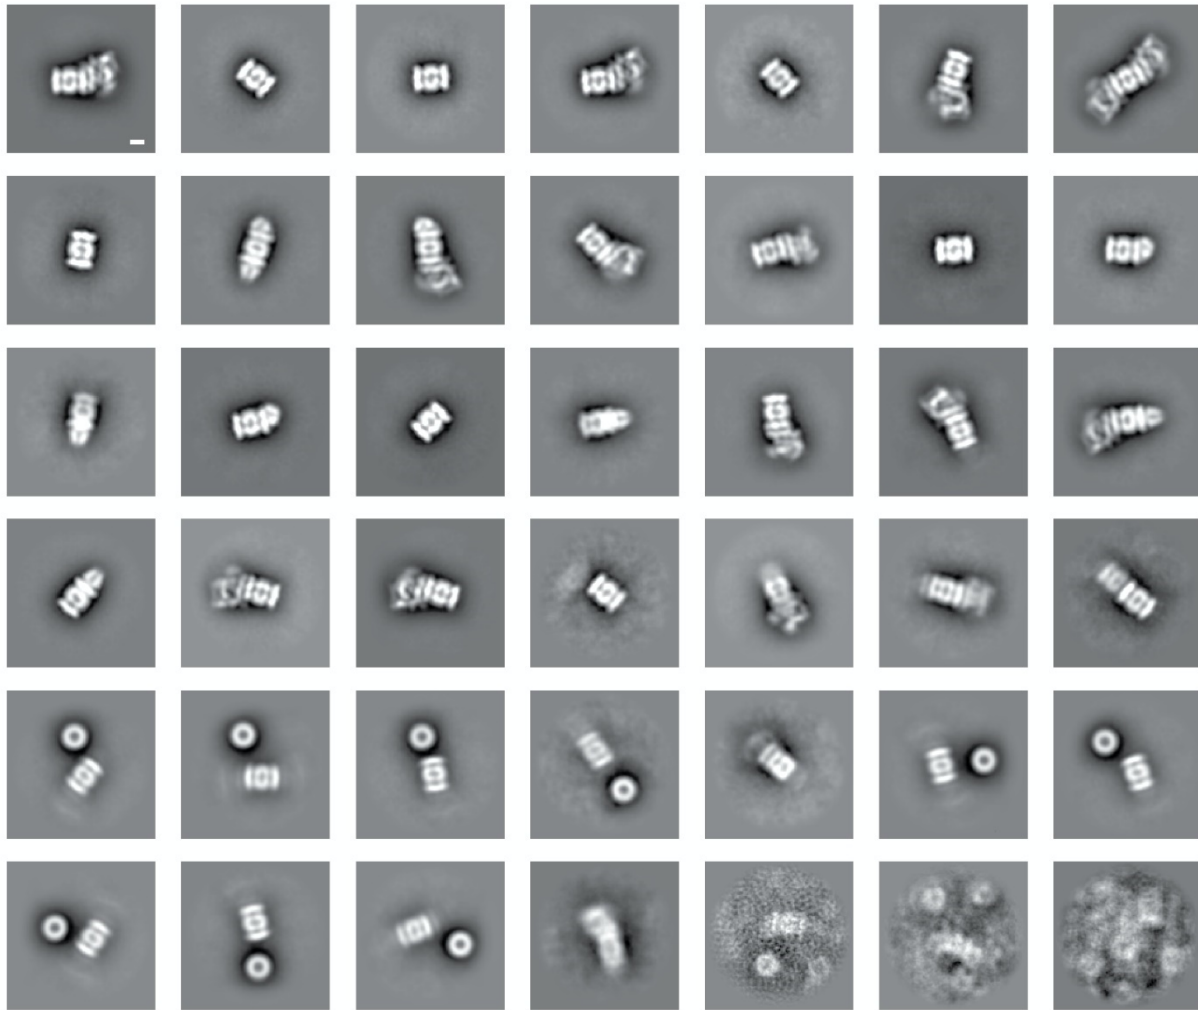

**Supplementary Figure 2. Negative stain EM of  $\beta$ 4-tagged proteasomal complexes.** 2D classification of the images show a diverse population of different proteasomal complexes formed between 20S, 19S, PA28, and PA200. Scale bar, 50 Å.

### PSMB2-StrepII

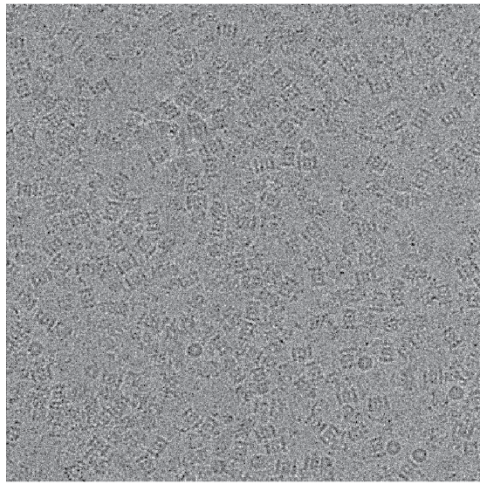

3,761 micrographs

template picking  
→  
1,912,794  
particle  
images

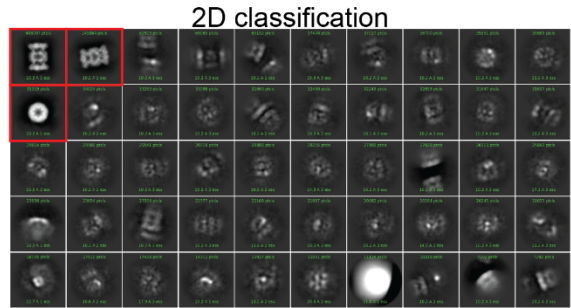

2D classification

↓ heterogeneous  
refinement

homogeneous  
refinement

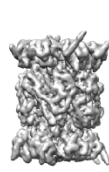

499,629  
particles

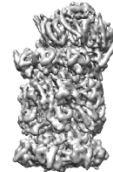

50,767  
particles

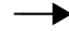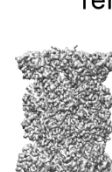

20S  
2.7 Å

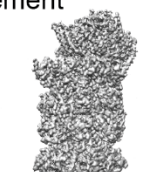

PA200-20S  
3.1 Å

### ALFA-PSME1

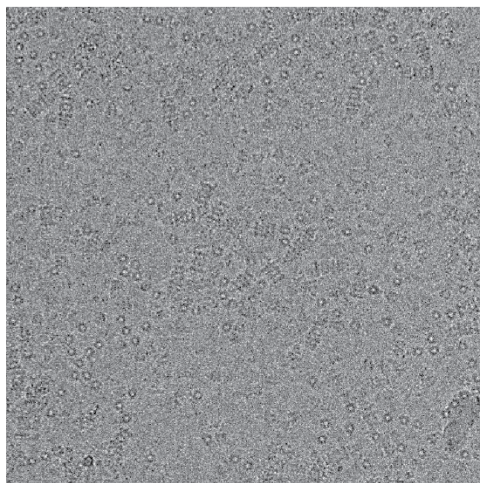

template picking  
→  
2,540,092  
particle  
images

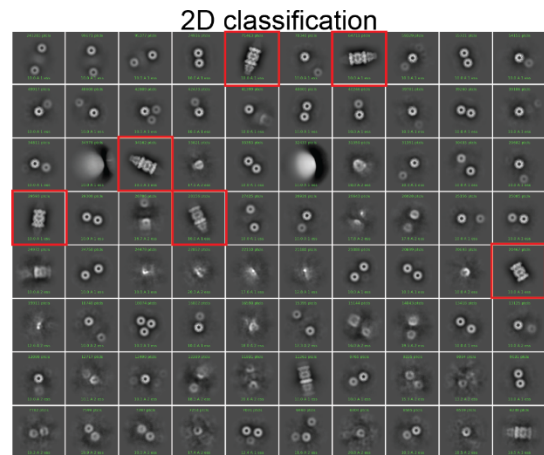

2D classification

↓ 248,552  
particle  
images

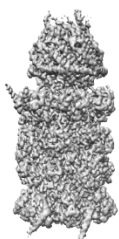

PA28-20S (2.9 Å)  
135,937 particle images

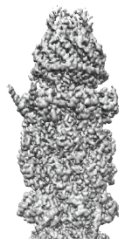

PA28-20S-PA28 (3.2 Å)  
22,946 particle images

homogeneous  
refinement

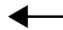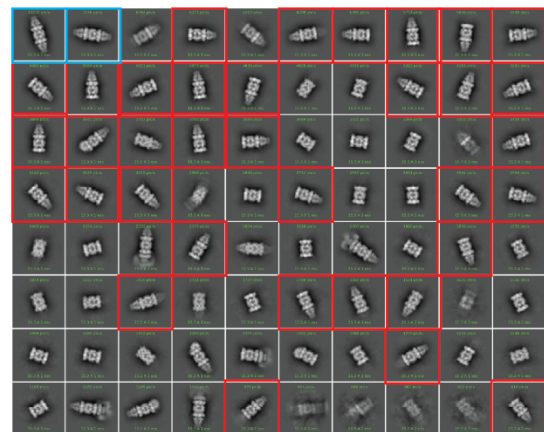

PSMB2-StrepII + MG132

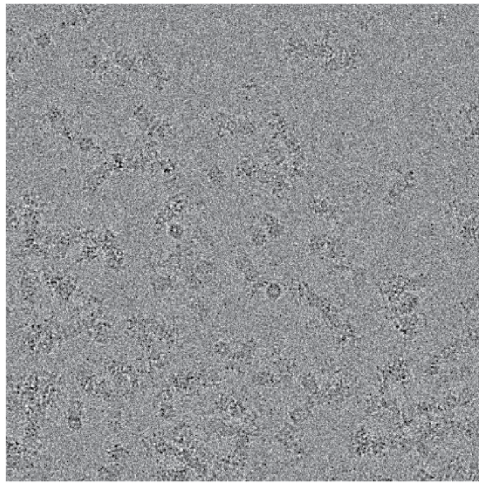

8,128 micrographs

template picking  
 →  
 3,537,033  
 particle  
 images

2D classification

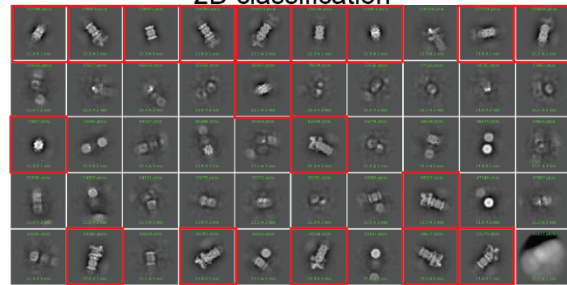

homogeneous  
 refinement

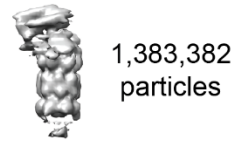

1,383,382  
 particles

heterogeneous  
 refinement

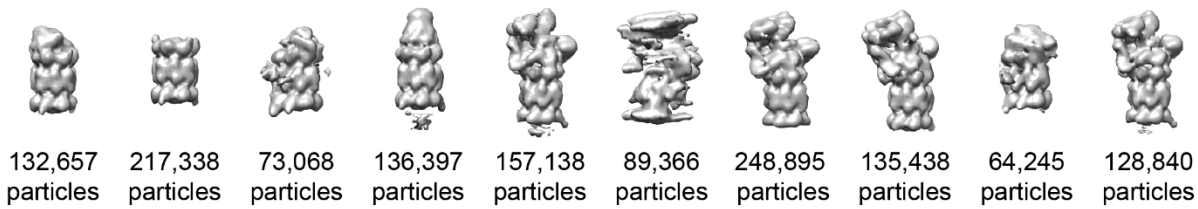

132,657 particles   217,338 particles   73,068 particles   136,397 particles   157,138 particles   89,366 particles   248,895 particles   135,438 particles   64,245 particles   128,840 particles

homogeneous  
 refinement

heterogeneous refinement

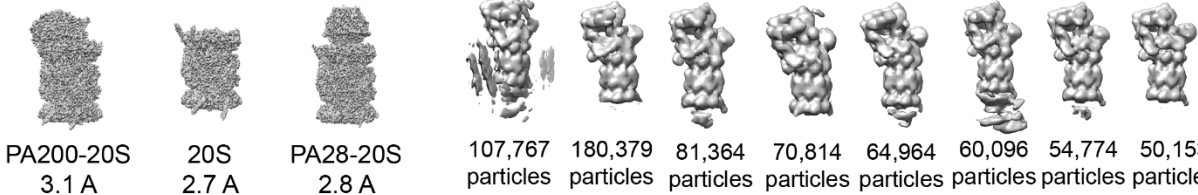

PA200-20S 3.1 Å   20S 2.7 Å   PA28-20S 2.8 Å   107,767 particles   180,379 particles   81,364 particles   70,814 particles   64,964 particles   60,096 particles   54,774 particles   50,153 particles

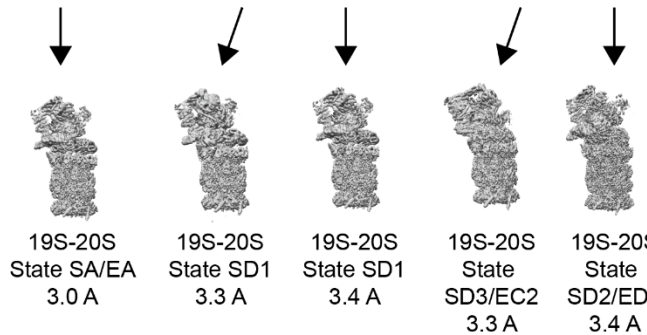

19S-20S State SA/EA 3.0 Å   19S-20S State SD1 3.3 Å   19S-20S State SD1 3.4 Å   19S-20S State SD3/EC2 3.3 Å   19S-20S State SD2/ED2 3.4 Å

**Supplementary Figure 3. Cryo-EM image processing workflow.** 2D and 3D classification for PSMB2-StrepII, ALFA-PSME1, and PSMB2-StrepII + MG132 samples.

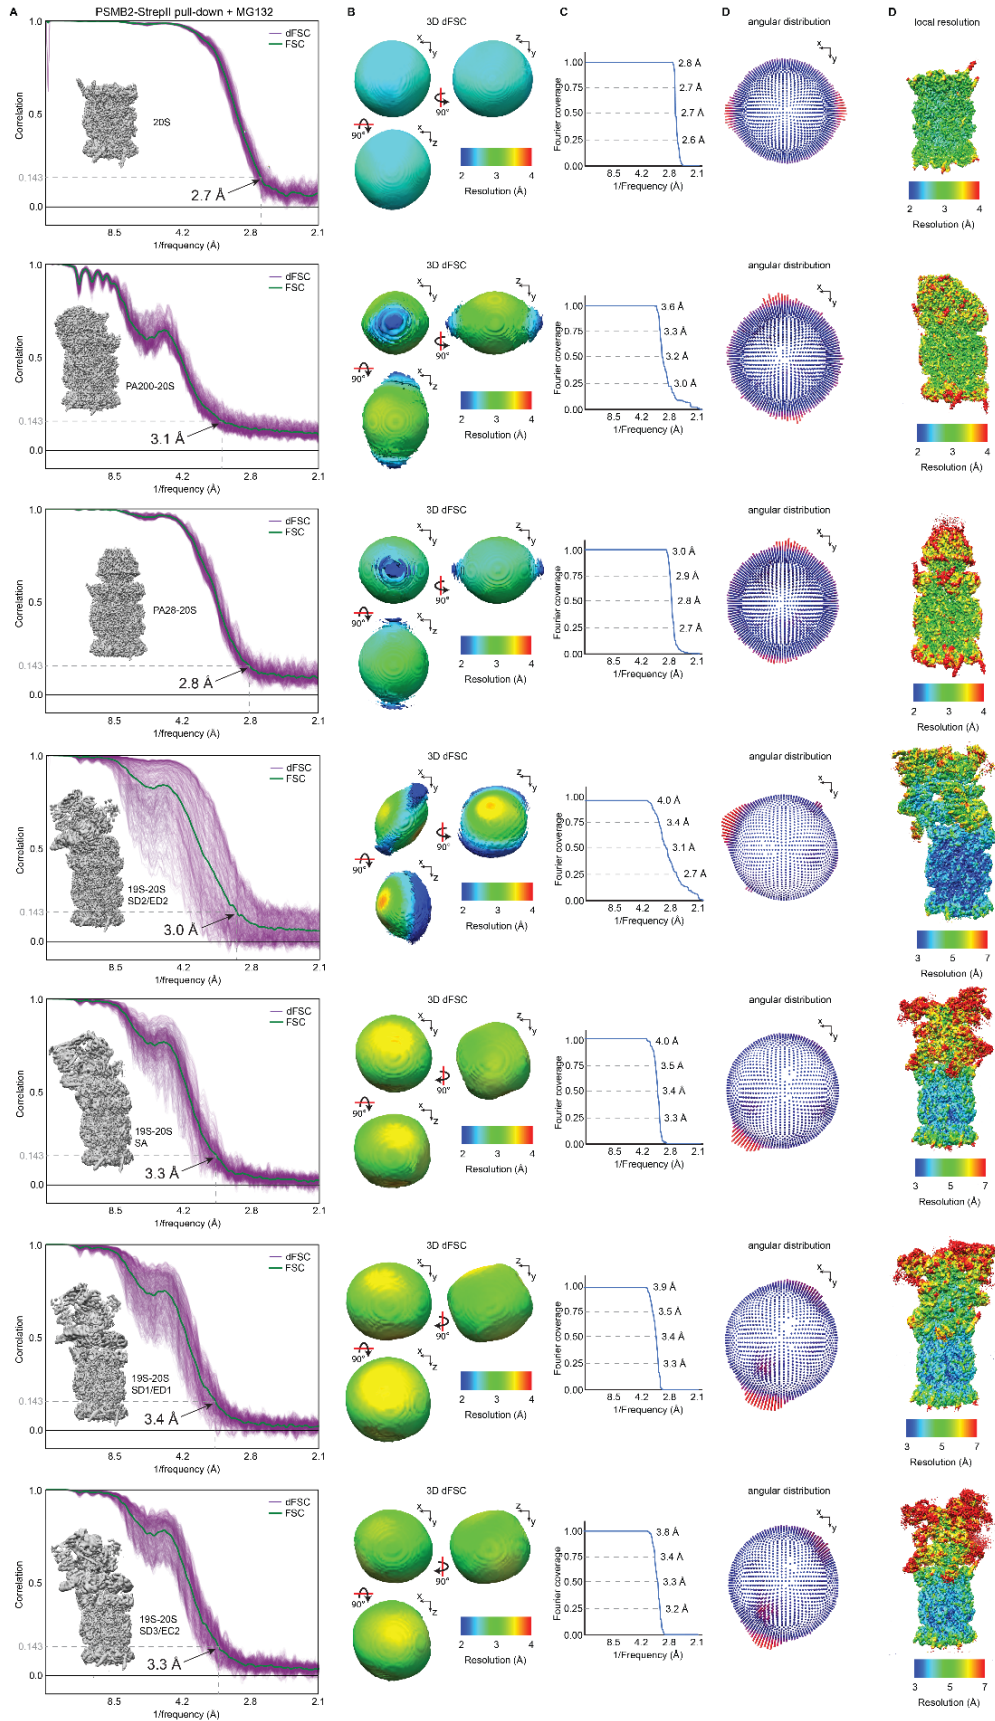

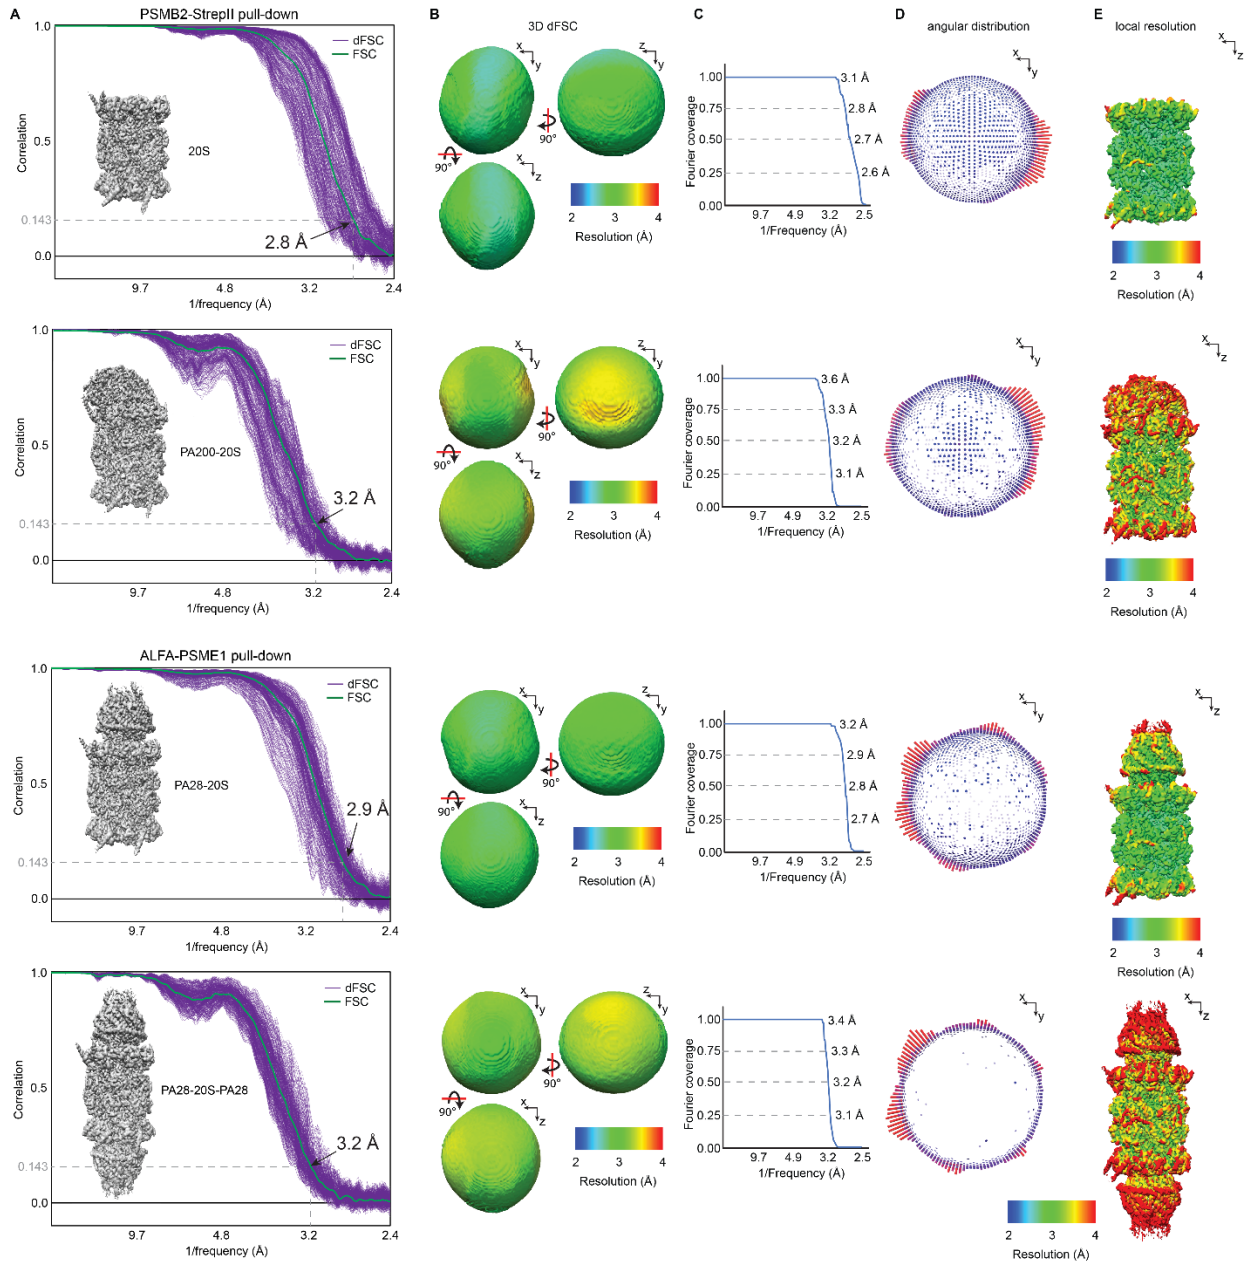

**Supplementary Figure 4. Cryo-EM map statistics. (A)** Fourier shell correlation (FSC) and 1D directional FSC (dFSC) plots. **(B)** Visualization of 3D dFSC. **(C)** Plots showing coverage of Fourier space. **(D)** Plots showing distribution of viewing angles from final refined datasets. **(E)** Corresponding local resolution map with color scale.

| Gene  | Seq. coverage (%) | Gene          | Seq. coverage (%) |
|-------|-------------------|---------------|-------------------|
| PSMB5 | 75.3              | PSMD11        | 70.1              |
| PSMA7 | 74.6              | PSMD13        | 76.9              |
| PSMA5 | 87.1              | PSMC3         | 67.2              |
| PSMB1 | 66.4              | PSMC5         | 70                |
| PSMA6 | 91.9              | PSMD12        | 55.3              |
| PSMA1 | 77.9              | PSME3         | 64.6              |
| PSMA4 | 72.4              | PSMD4         | 52.8              |
| PSMB6 | 77.4              | PSMC1         | 66.6              |
| PSMB7 | 71.8              | PSMC6         | 65                |
| PSMB4 | 75                | PSMD7         | 58                |
| PSMD1 | 59.7              | PSMC4         | 73.9              |
| PSMD2 | 76                | PSME1         | 67.5              |
| PSMA2 | 80.8              | PSME2         | 69                |
| PSMA3 | 80                | HSPA1B;HSPA1A | 61.3              |
| PSMB2 | 88.6              | PSMD14        | 69.4              |
| PSME4 | 52.6              | ADRM1         | 53.1              |
| PSMB3 | 70.2              | RPS27A;UBA52  | 55.8              |
| PSMC2 | 71.4              | TXNL1         | 66.1              |
| PSMD6 | 68.9              | PSMD8         | 46.9              |

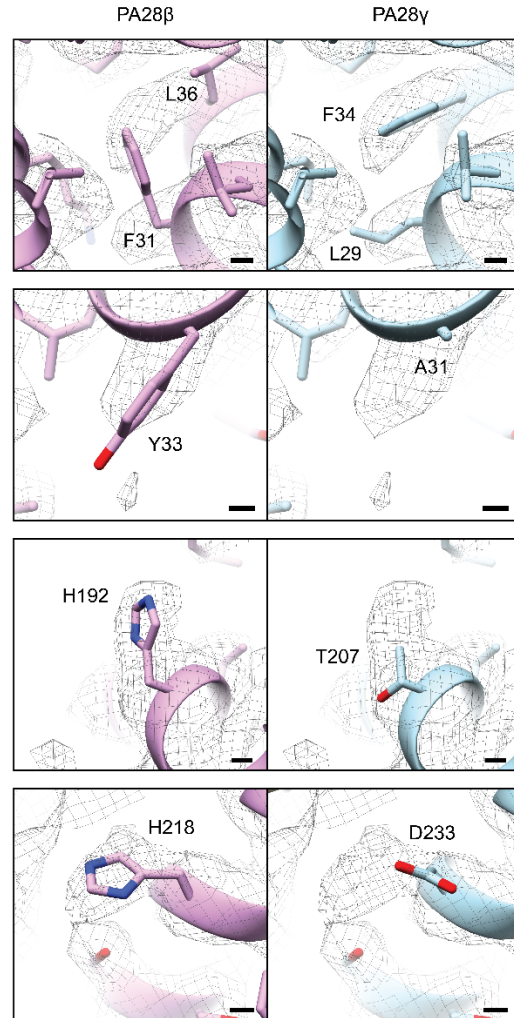

**Supplementary Figure 5.** Mass spectrometry (left) of 20S( $\beta$ 4-StreptII) pull-down shows co-purification with PA28 $\alpha$  (PSME1), PA28 $\beta$  (PSME2), and PA28 $\gamma$  (PSME3). Cryo-EM density map of PA28-20S( $\beta$ 4-StreptII) was modeled with both PA28 $\alpha\beta$  and PA28 $\gamma$  (right). The density fits PA28 $\gamma$  sidechains in some regions (F34, L29) while PA28 $\beta$  sidechains are better fit in other regions (Y33, H192, H218), indicating that the map is an average of PA28 $\alpha\beta$  and PA28 $\gamma$ .



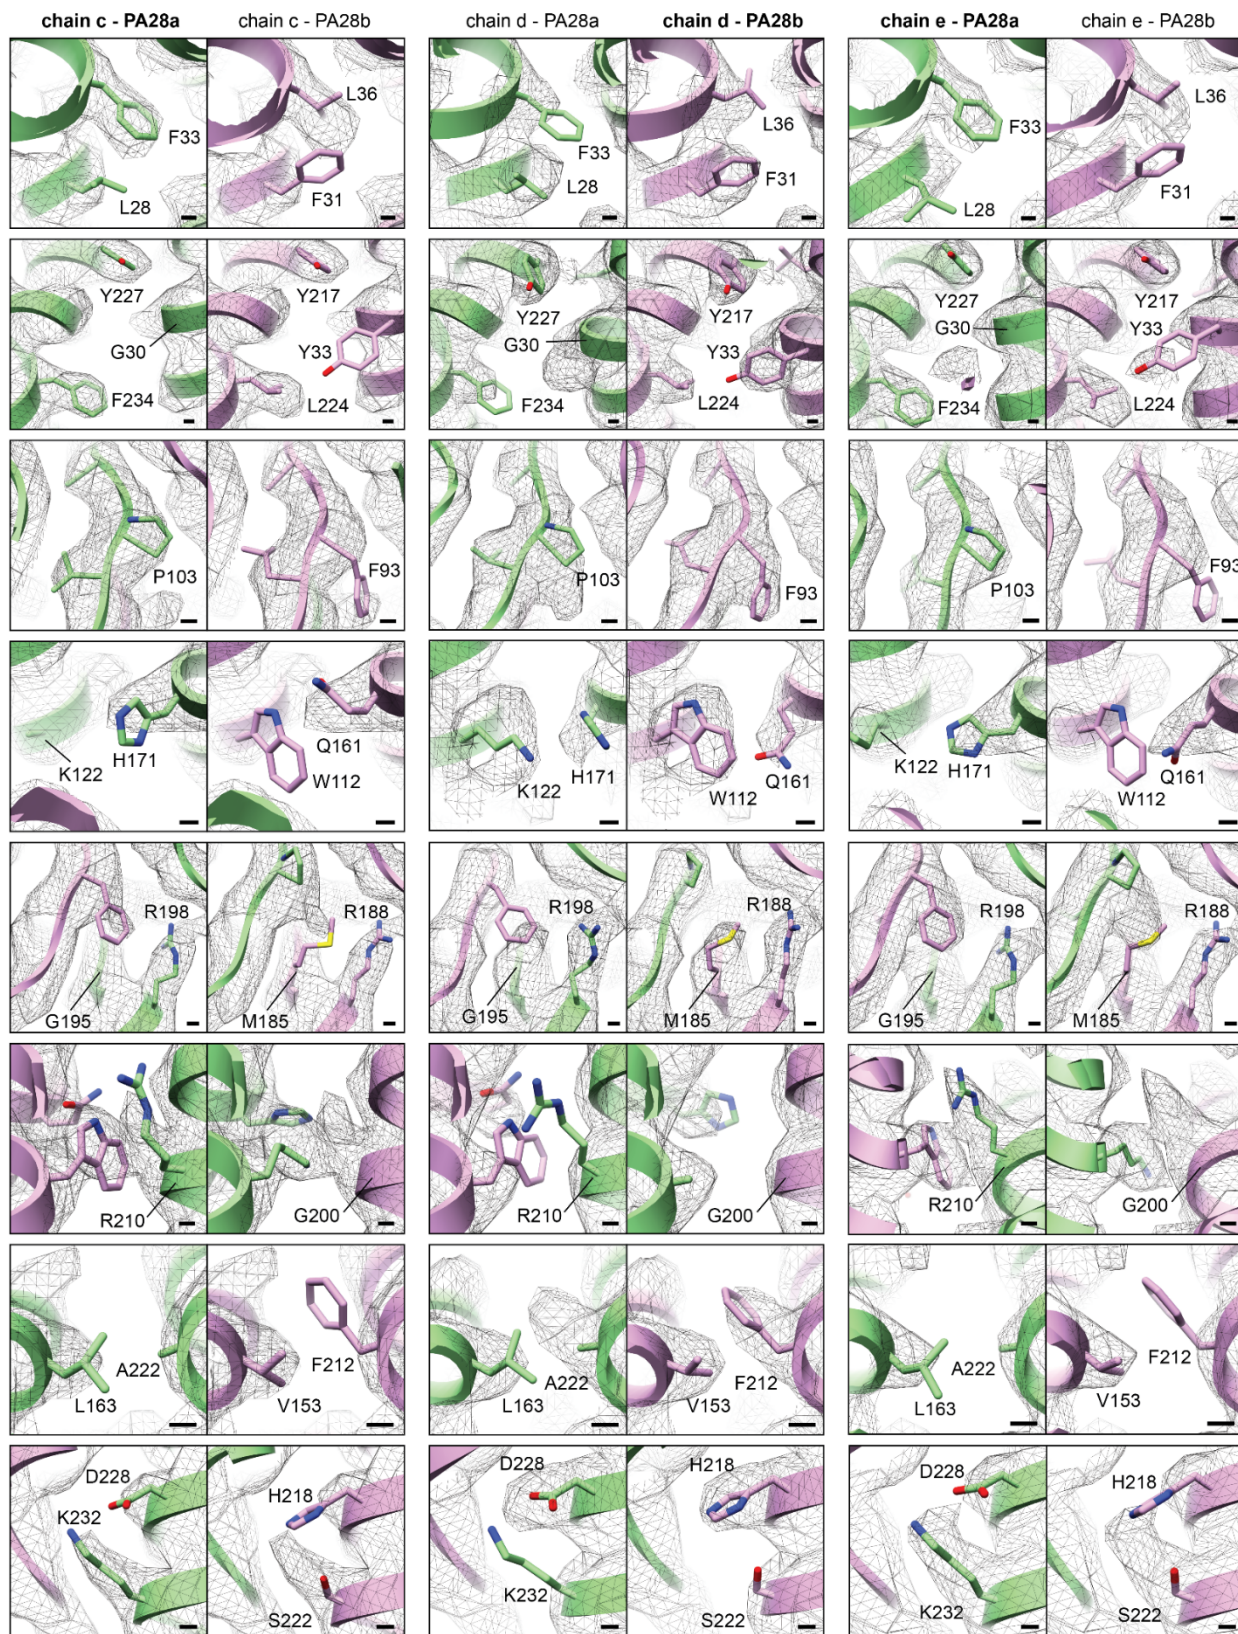

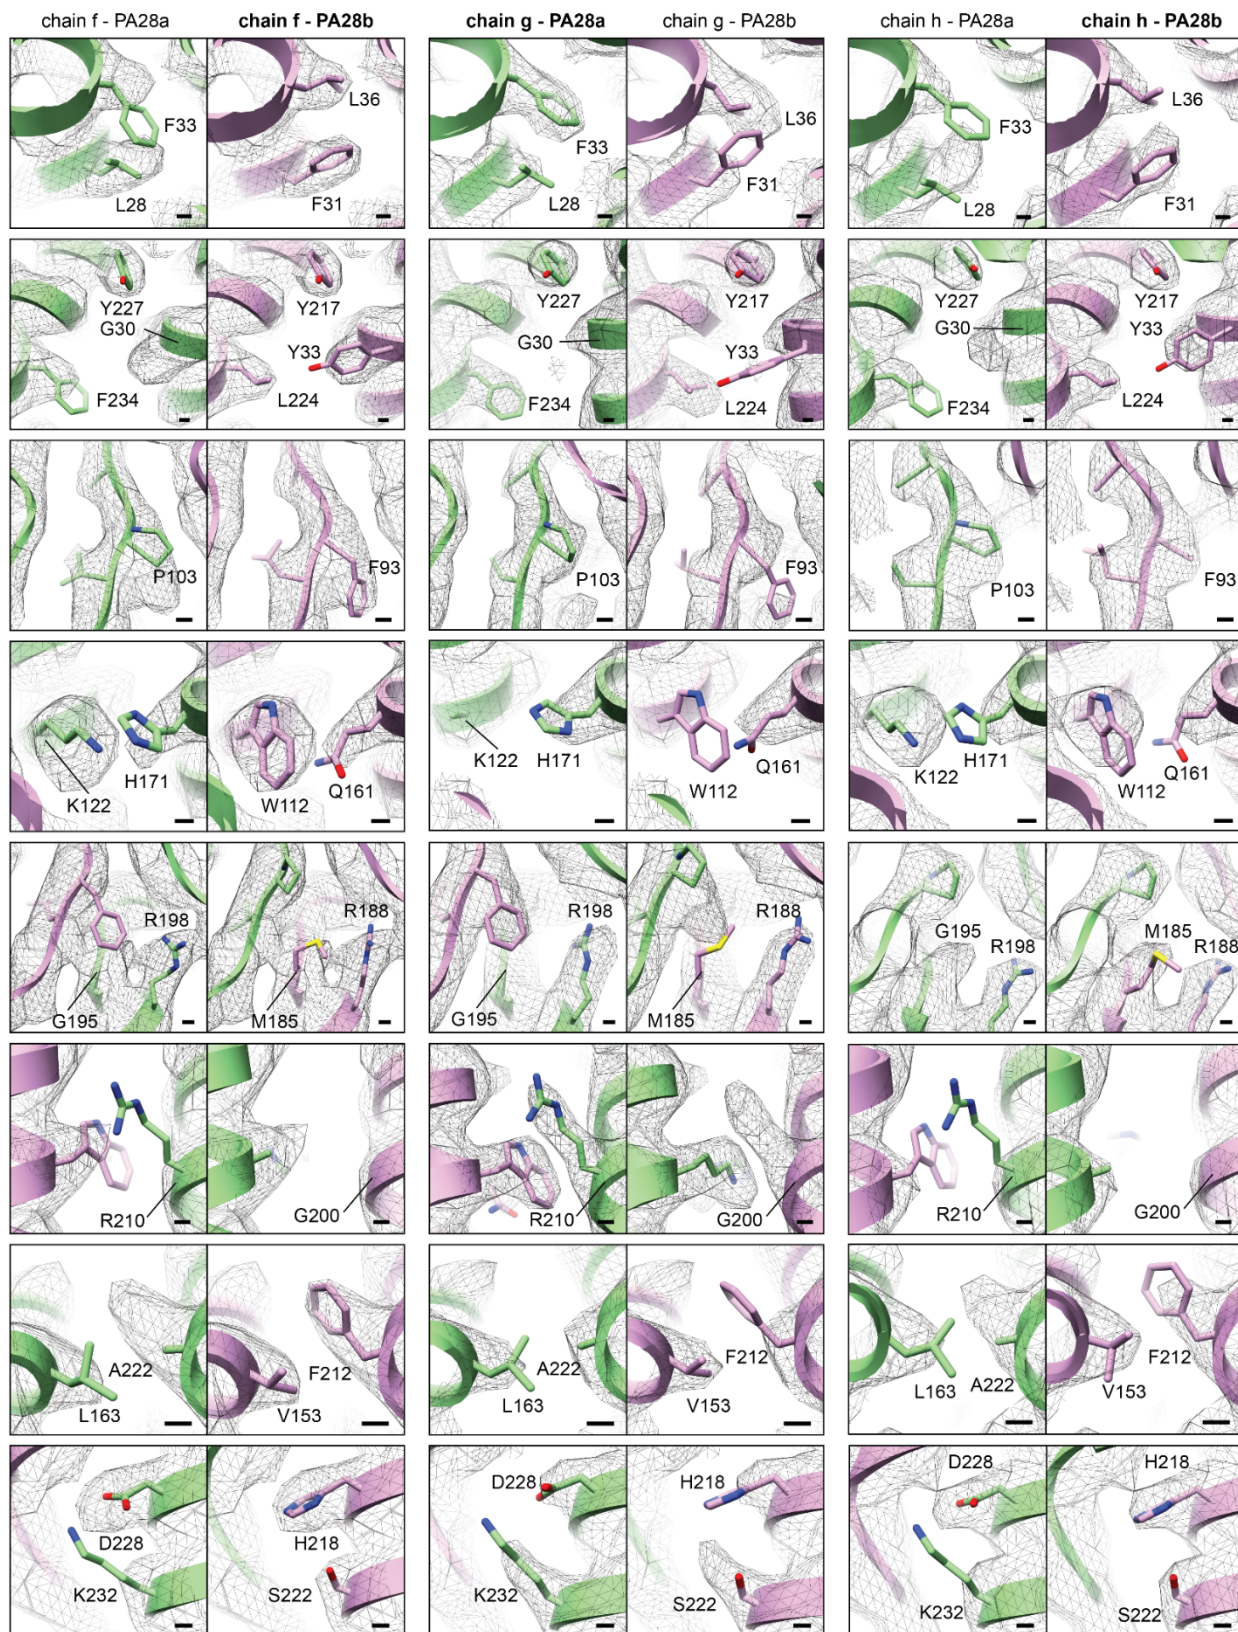

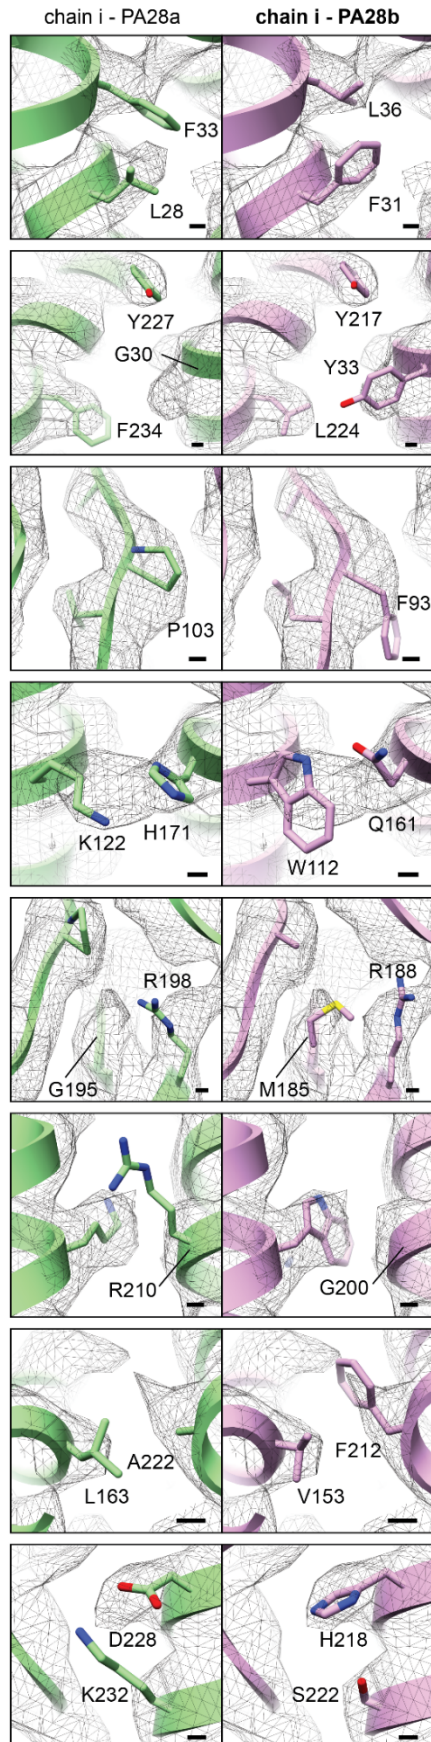

**Supplementary Figure 6. PA28 model fit to map density.** For each chain in PA28, PA28a (PSME1) and PA28b (PSME2) were modeled into the cryo-EM density map of single capped PA28-20S proteasome. Key differences in the model-to-map fit are highlighted and support a stoichiometry of {a,b,a,b,a,b,b} for chains {c,d,e,f,g,h,i}, respectively. Scale bar, 1 Angstrom.

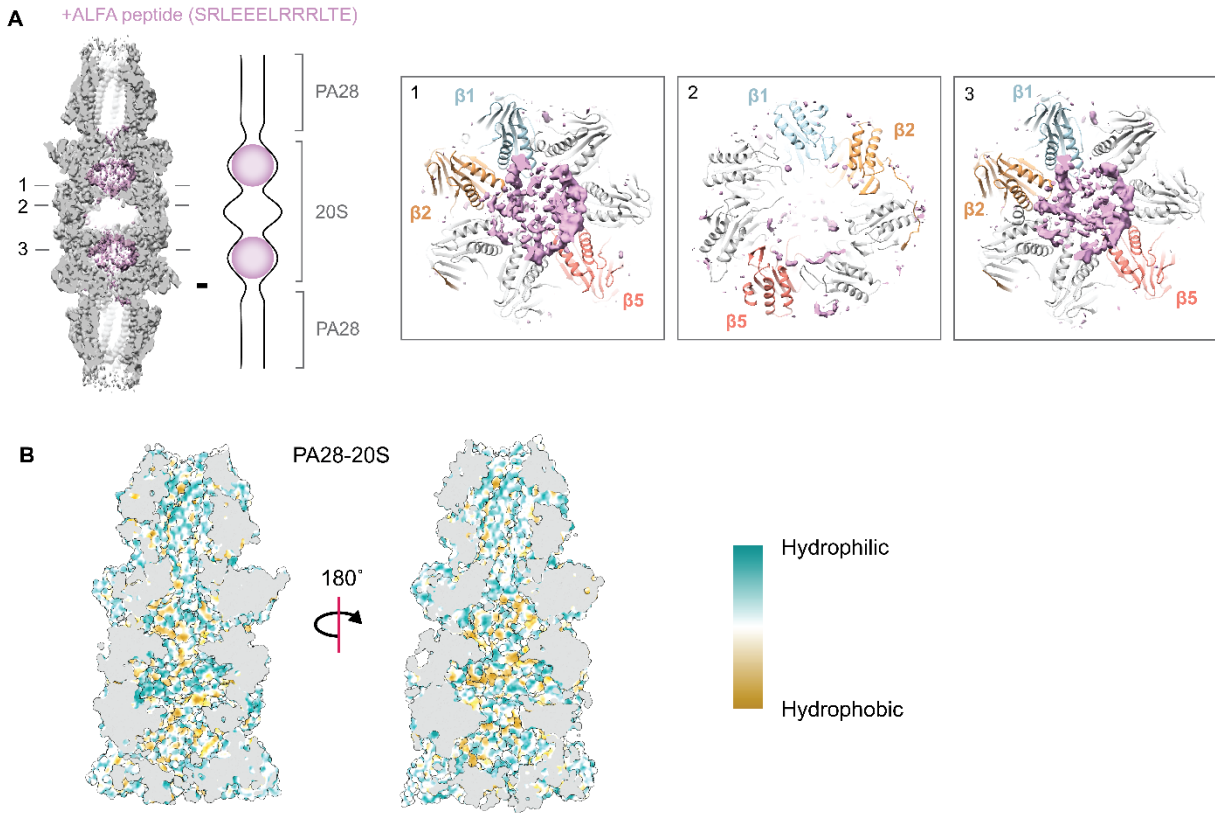

**Supplementary Figure 7. (A)** Cryo-EM map of double capped PA28-20S-PA28 shows ALFA peptide density in both antechambers. **(B)** The walls of the 20S proteasome inner chambers are made up of both hydrophilic and hydrophobic regions.

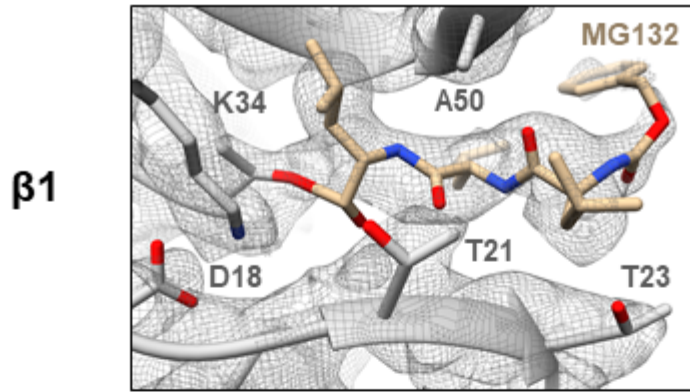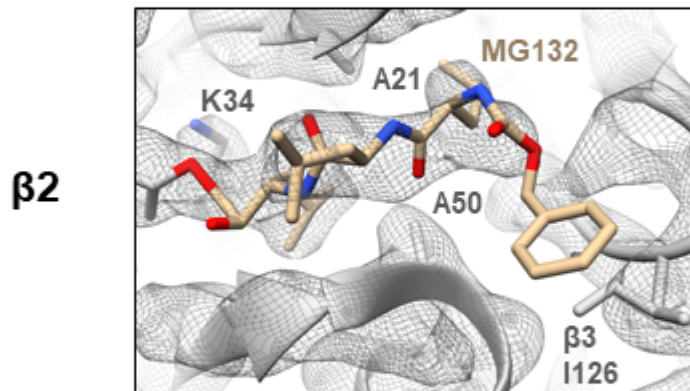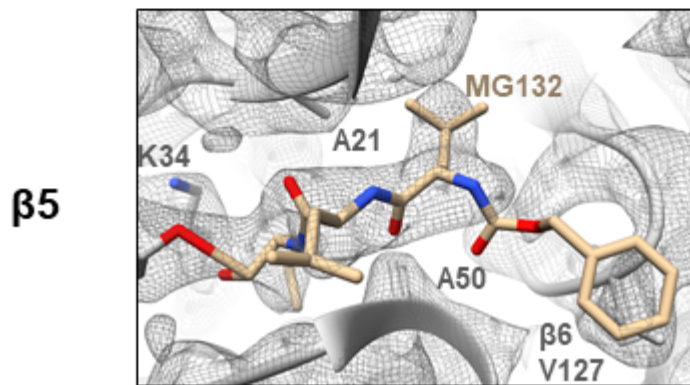

**Supplementary Figure 8.** Fit of MG132 into the PA28-20S cryo-EM density at the proteolytic sites of  $\beta 1$ ,  $\beta 2$ , and  $\beta 5$ .

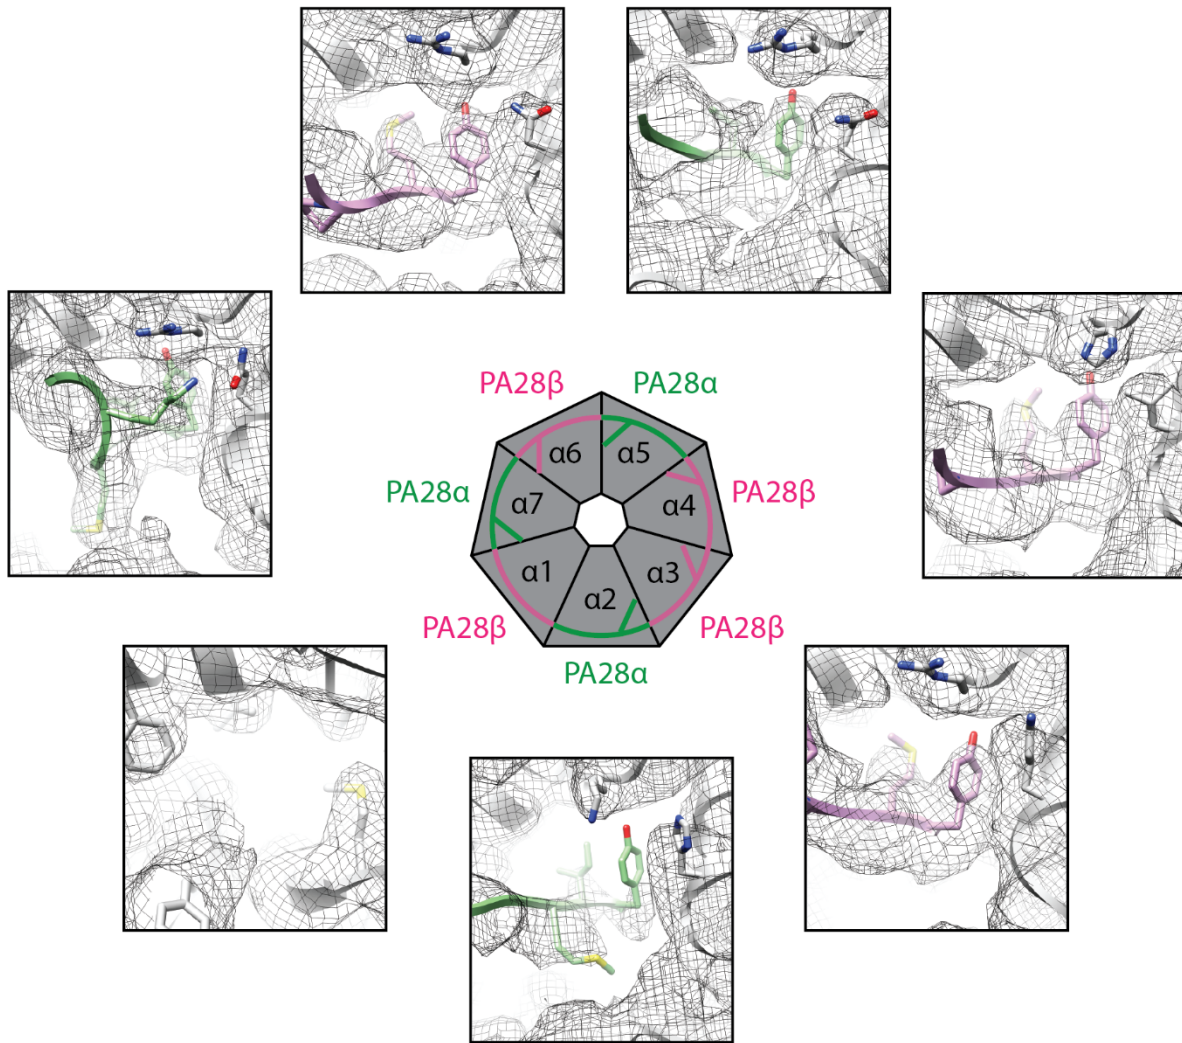

**Supplementary Figure 9.** PA28 C-terminal tail model and map density. Density is observed for the C-terminal tails of PA28 subunits for 6 out of 7 binding sites.

**Supplementary Table 1. Cryo-EM imaging parameters**

| <b>PSMB2-StrepII pulldown</b>                                                                                                       |                                                                                                                        |
|-------------------------------------------------------------------------------------------------------------------------------------|------------------------------------------------------------------------------------------------------------------------|
| Microscope                                                                                                                          | Polara (300 kV), UCSF                                                                                                  |
| Camera (software)                                                                                                                   | Gatan K2 Summit (SerialEM, 1 shot/hole)                                                                                |
| Magnification (at detector)                                                                                                         | 40,984X                                                                                                                |
| Exposure rate (total)                                                                                                               | 8 e/pixel/s (43 e/Å <sup>2</sup> )                                                                                     |
| Frames                                                                                                                              | 30                                                                                                                     |
| Pixel size                                                                                                                          | 1.22 Å/pixel                                                                                                           |
| Defocus range (um)                                                                                                                  | 1.2 – 3.1                                                                                                              |
| Micrographs (# initial particles)                                                                                                   | 3761 (1,912,794)                                                                                                       |
| # of 3D classes (# particles)                                                                                                       | 3 (550,396)                                                                                                            |
| Class 1 (# particles), codes<br>Resolution (0.143/0.5)<br>Local resolution (min-max)<br>3DFSC spread (0.143)<br>Sharpening B-factor | 20S (499,629), EMD-24275, PDB 7NAN<br>2.8/3.8 Å (mask), 3.5/4.1 Å (no mask)<br>2.7 – 29 Å<br>2.5 – 2.8 Å<br>0          |
| Class 2 (# particles), codes<br>Resolution (0.143/0.5)<br>Local resolution (min-max)<br>3DFSC spread (0.143)<br>Sharpening B-factor | PA200-20S (50,767), EMD-24278, PDB 7NAQ<br>3.2/4.4 Å (mask), 4.2/7.6 Å (no mask)<br>2.8 – 50 Å<br>3.0 – 3.6 Å<br>0     |
| Class 3 (# particles)                                                                                                               | 19S-20S (did not refine)                                                                                               |
| <b>ALFA-PSME1 pulldown</b>                                                                                                          |                                                                                                                        |
| Microscope                                                                                                                          | Polara (300 kV), UCSF                                                                                                  |
| Camera (software)                                                                                                                   | Gatan K2 Summit (SerialEM, 1 shot/hole)                                                                                |
| Magnification (at detector)                                                                                                         | 40,984X                                                                                                                |
| Exposure rate (total)                                                                                                               | 8 e/pixel/s (43 e/Å <sup>2</sup> )                                                                                     |
| Frames                                                                                                                              | 30                                                                                                                     |
| Pixel size                                                                                                                          | 1.22 Å/pixel                                                                                                           |
| Defocus range (um)                                                                                                                  | 1.3 – 2.0                                                                                                              |
| Micrographs (# initial particles)                                                                                                   | 5994 (2,540,092)                                                                                                       |
| # of 3D classes (# particles)                                                                                                       | 2 (158,883)                                                                                                            |
| Class 1 (# particles), codes<br>Resolution (0.143/0.5)<br>Local resolution (min-max)<br>3DFSC spread (0.143)<br>Sharpening B-factor | PA28-20S (135,937), EMD-24276, PDB 7NAO<br>2.9/3.9 Å (mask), 3.8/5.3 Å (no mask)<br>2.7 – 43 Å<br>2.6 – 3.2 Å<br>0     |
| Class 2 (# particles), codes<br>Resolution (0.143/0.5)<br>Local resolution (min-max)<br>3DFSC spread (0.143)<br>Sharpening B-factor | PA28-20S-PA28 (22,946), EMD-24277, PDB 7NAP<br>3.2/4.5 Å (mask), 6.1/8.5 Å (no mask)<br>2.7 – 52 Å<br>3.0 – 3.4 Å<br>0 |
| <b>PSMB2-StrepII pulldown + MG132</b>                                                                                               |                                                                                                                        |
| Microscope                                                                                                                          | Titan Krios (300 kV), SBP                                                                                              |
| Camera (software)                                                                                                                   | Gatan K3 (SerialEM, 4-shots/hole)                                                                                      |

|                                                                                                                                     |                                                                                                                                                        |
|-------------------------------------------------------------------------------------------------------------------------------------|--------------------------------------------------------------------------------------------------------------------------------------------------------|
| Magnification (at detector)                                                                                                         | 47,170X                                                                                                                                                |
| Exposure rate (total)                                                                                                               | 25 e/pixel/s (30 e/Å <sup>2</sup> )                                                                                                                    |
| Frames                                                                                                                              | 20                                                                                                                                                     |
| Pixel size                                                                                                                          | 1.06 Å/pixel                                                                                                                                           |
| Defocus range (um)                                                                                                                  | 1.3 – 2.3                                                                                                                                              |
| Micrographs (# initial particles)                                                                                                   | 8128 (3,537,033)                                                                                                                                       |
| # of 3D classes                                                                                                                     | 7 (729,026)                                                                                                                                            |
| Class 1 (# particles), codes<br>Resolution (0.143/0.5)<br>Local resolution (min-max)<br>3DFSC spread (0.143)<br>Sharpening B-factor | 20S (214,790), EMD-27013, PDB 8CVR<br>2.7/3.1 Å (masked), 3.3/4.1 Å (unmasked)<br>2.5 – 45 Å<br>2.5 – 2.8 Å<br>0                                       |
| Class 2 (# particles), codes<br>Resolution (0.143/0.5)<br>Local resolution (min-max)<br>3DFSC spread (0.143)<br>Sharpening B-factor | PA200-20S (70,412), EMD-27015, PDB 8CVS<br>3.1/4.3 Å (masked), 4.1/8.0 (unmasked)<br>2.4 – 40 Å<br>2.2 – 3.6 Å<br>0                                    |
| Class 3 (# particles), codes<br>Resolution (0.143/0.5)<br>Local resolution (min-max)<br>3DFSC spread (0.143)<br>Sharpening B-factor | PA28-20S (136,392), EMD-27014<br>2.8/3.4 Å (masked), 4.1/7.8 Å (unmasked)<br>2.6 – 45 Å<br>2.3 – 3.0 Å<br>0                                            |
| Class 4 (# particles), codes<br>Resolution (0.143/0.5)<br>Local resolution (min-max)<br>3DFSC spread (0.143)<br>Sharpening B-factor | 19S-20S, S <sub>A</sub> /E <sub>A</sub> (65,390), EMD-27016<br>3.3/4.1 Å (masked), 7.1/9.4 Å (unmasked)<br>3.1 – 57 Å<br>3.0 – 4.0 Å<br>0              |
| Class 5 (# particles), codes<br>Resolution (0.143/0.5)<br>Local resolution (min-max)<br>3DFSC spread (0.143)<br>Sharpening B-factor | 19S-20S, S <sub>D1</sub> (45,734), EMD-27017<br>3.4/4.2 Å (masked), 7.3/11 Å (unmasked)<br>3.1 – 57 Å<br>3.2 – 3.9 Å<br>0                              |
| Class 6 (# particles), codes<br>Resolution (0.143/0.5)<br>Local resolution (min-max)<br>3DFSC spread (0.143)<br>Sharpening B-factor | 19S-20S, S <sub>D2</sub> /E <sub>D2</sub> (147,696), EMD-27018, PDB 8CVT<br>3.1/3.8 Å (masked), 4.7/8.9 Å (unmasked)<br>2.8 – 51 Å<br>2.2 – 4.0 Å<br>0 |
| Class 7 (# particles), codes<br>Resolution (0.143/0.5)<br>Local resolution (min-max)<br>3DFSC spread (0.143)<br>Sharpening B-factor | 19S-20S, S <sub>D3</sub> /E <sub>C2</sub> (48,612), EMD-27019<br>3.3/4.1 Å (masked), 7.2/11 Å (unmasked)<br>3.1 – 57 Å<br>3.1 – 3.8 Å<br>0             |



**Supplementary Table 2. Comparing PA28(4a3b) and PA28(3a4b) models**

| Model composition                   | 20S-PA28(4a3b) | 20S-PA28(3a4b) |
|-------------------------------------|----------------|----------------|
| PDB code                            | 8CXB           | 7NAO           |
| Atomic modeling package             | Coot           | Coot           |
| CCvolume/CCmask                     | 0.85/0.85      | 0.85/0.85      |
| B-factor (masked/unmasked)          | 70/75          | 70/75          |
| RMSD bond lengths, angles           | 0.007/1.281    | 0.006/1.090    |
| Molprobit score                     | 1.41           | 1.04           |
| Clashscore                          | 4.59           | 2.51           |
| Rotamers outliers (%)               | 1.71           | 0              |
| C-beta outliers (%)                 | 0.25           | 0              |
| Ramachandrans (Favored, outliers) % | 98.57/0.09     | 98.63/0.07     |
| CaBLAM outliers (%)                 | 1.39           | 1.41           |
| EMRinger score                      | 3.05           | 3.09           |
